# Supplementary material for: Research Progress on the Species and Diversity of Ants and Their Three Tropisms
Source: MDPI journal article supplement (doi:10.3390/insects14110892), 2023-11-18
Supplement: s1 [file s1]

**Table S1** List of subfamilies and genus, and the number of respective species of ants in China

| Subfamily                                      | Genus                            | Species                         |
|------------------------------------------------|----------------------------------|---------------------------------|
| Amblyoponinae<br>(Total 4 genera, 13 species)  | <i>Amblyopone</i> (10 species)   | <i>Amblyopone actodentata</i>   |
|                                                |                                  | <i>Amblyopone bruni</i>         |
|                                                |                                  | <i>Amblyopone crenata</i>       |
|                                                |                                  | <i>Amblyopone eminia</i>        |
|                                                |                                  | <i>Amblyopone rothneyi</i>      |
|                                                |                                  | <i>Amblyopone rubiginosa</i>    |
|                                                |                                  | <i>Amblyopone sakaii</i>        |
|                                                |                                  | <i>Amblyopone silvestrii</i>    |
|                                                |                                  | <i>Amblyopone triloba</i>       |
|                                                |                                  | <i>Amblyopone zaojun</i>        |
|                                                | <i>Bannapone</i> (1 species)     | <i>Bannapone mulanae</i>        |
|                                                | <i>Mystrium</i> (1 species)      | <i>Mystrium coulatum</i>        |
|                                                | <i>Prionopelta</i> (1 species)   | <i>Prionopelta kraepelini</i>   |
| Dolichoderinae<br>(Total 7 genera, 30 species) | <i>Bothriomyrmex</i> (1 species) | <i>Bothriomyrmex kusnezovi</i>  |
|                                                | <i>Chronoxenus</i> (1 species)   | <i>Chronoxenus dalyi</i>        |
|                                                | <i>Dolichoderus</i> (15 species) | <i>Dolichoderus affinis</i>     |
|                                                |                                  | <i>Dolichoderus breviscapus</i> |
|                                                |                                  | <i>Dolichoderus brunneus</i>    |
|                                                |                                  | <i>Dolichoderus dajiensis</i>   |
|                                                |                                  | <i>Dolichoderus feae</i>        |
|                                                |                                  | <i>Dolichoderus flatidorsus</i> |
|                                                |                                  | <i>Dolichoderus flavus</i>      |
|                                                |                                  | <i>Dolichoderus incisus</i>     |
|                                                |                                  | <i>Dolichoderus pilosus</i>     |
|                                                |                                  | <i>Dolichoderus roticepus</i>   |
|                                                |                                  | <i>Dolichoderus rugocapitus</i> |
|                                                |                                  | <i>Dolichoderus sagmanotus</i>  |
|                                                |                                  | <i>Dolichoderus sibiricus</i>   |
|                                                |                                  | <i>Dolichoderus squamanodus</i> |
|                                                |                                  | <i>Dolichoderus taprobanae</i>  |
|                                                | <i>Iridomyrmex</i> (1 species)   | <i>Iridomyrmex anceps</i>       |
|                                                | <i>Liometopum</i> (2 species)    | <i>Liometopum lindgreeni</i>    |
|                                                |                                  | <i>Liometopum sinense</i>       |
|                                                | <i>Tapinoma</i> (6 species)      | <i>Tapinoma geei</i>            |
|                                                |                                  | <i>Tapinoma melanocephalum</i>  |
|                                                |                                  | <i>Tapinoma orthocephalum</i>   |
|                                                |                                  | <i>Tapinoma rectinotum</i>      |
|                                                |                                  | <i>Tapinoma simrothi</i>        |
|                                                |                                  | <i>Tapinoma sinense</i>         |

|                                              |                                 |                                      |
|----------------------------------------------|---------------------------------|--------------------------------------|
|                                              | <i>Technomyrmex</i> (4 species) | <i>Technomyrmex albipes</i>          |
|                                              |                                 | <i>Technomyrmex antennus</i>         |
|                                              |                                 | <i>Technomyrmex bicolor</i>          |
|                                              |                                 | <i>Technomyrmex brunneus</i>         |
| Ectatomminae<br>(Total 1 genus, 7 species)   | <i>Gnamptogenys</i> (7 species) | <i>Gnamptogenys bicolor</i>          |
|                                              |                                 | <i>Gnamptogenys binghami</i>         |
|                                              |                                 | <i>Gnamptogenys coccina</i>          |
|                                              |                                 | <i>Gnamptogenys panda</i>            |
|                                              |                                 | <i>Gnamptogenys sichuanensis</i>     |
|                                              |                                 | <i>Gnamptogenys sinensis</i>         |
|                                              |                                 | <i>Gnamptogenys taicanensis</i>      |
| Formicinae<br>(Total 20 genera, 294 species) | <i>Acropyga</i> (6 species)     | <i>Acropyga acuirentris</i>          |
|                                              |                                 | <i>Acropyga butteli</i>              |
|                                              |                                 | <i>Acropyga nipponensis</i>          |
|                                              |                                 | <i>Acropyga sauteri</i>              |
|                                              |                                 | <i>Acropyga yaeyamensis</i>          |
|                                              |                                 | <i>Acropyga yashi</i>                |
|                                              | <i>Anoplolepis</i> (1 species)  | <i>Anoplolepis gracilipes</i>        |
|                                              | <i>Camponotus</i> (86 species)  | <i>Camponotus aethiops</i>           |
|                                              |                                 | <i>Camponotus albivillosus</i>       |
|                                              |                                 | <i>Camponotus albosparsus</i>        |
|                                              |                                 | <i>Camponotus anningensis</i>        |
|                                              |                                 | <i>Camponotus atrox</i>              |
|                                              |                                 | <i>Camponotus auratiacus</i>         |
|                                              |                                 | <i>Camponotus badius</i>             |
|                                              |                                 | <i>Camponotus barbatus</i>           |
|                                              |                                 | <i>Camponotus bedoti</i>             |
|                                              |                                 | <i>Camponotus bonariensis</i>        |
|                                              |                                 | <i>Camponotus breriscapus</i>        |
|                                              |                                 | <i>Camponotus carin</i>              |
|                                              |                                 | <i>Camponotus carin subsp.tipuna</i> |
|                                              |                                 | <i>Camponotus chongqingensis</i>     |
|                                              |                                 | <i>Camponotus compressus</i>         |
|                                              |                                 | <i>Camponotus confucii</i>           |
|                                              |                                 | <i>Camponotus cornis</i>             |
|                                              |                                 | <i>Camponotus derestirus</i>         |
|                                              |                                 | <i>Camponotus dolendus</i>           |
|                                              |                                 | <i>Camponotus exiguo guttatus</i>    |
|                                              |                                 | <i>Camponotus fedaschenkoi</i>       |
|                                              |                                 | <i>Camponotus fextinus</i>           |
|                                              |                                 | <i>Camponotus formosensis</i>        |
|                                              |                                 | <i>Camponotus friedae</i>            |
|                                              |                                 | <i>Camponotus fuscirillosus</i>      |

|  |  |
|--|--|
|  |  |
|--|--|

|                                                          |
|----------------------------------------------------------|
| <i>Camponotus guizhouensis</i>                           |
| <i>Camponotus habereri</i>                               |
| <i>Camponotus helous</i>                                 |
| <i>Camponotus herculeanus</i>                            |
| <i>Camponotus holosericeus</i>                           |
| <i>Camponotus holthoffi</i>                              |
| <i>Camponotus humerus</i>                                |
| <i>Camponotus interjectus</i>                            |
| <i>Camponotus irritans</i>                               |
| <i>Camponotus irritans</i><br><i>subsp.honghongensis</i> |
| <i>Camponotus itoi</i>                                   |
| <i>Camponotus japonicus</i>                              |
| <i>Camponotus jianghuaensis</i>                          |
| <i>Camponotus kiusiuensis</i>                            |
| <i>Camponotus kurdistanicus</i>                          |
| <i>Camponotus laotzei</i>                                |
| <i>Camponotus largiceps</i>                              |
| <i>Camponotus lasiselene</i>                             |
| <i>Camponotus leonardi</i>                               |
| <i>Camponotus liehti</i>                                 |
| <i>Camponotus ligniperdus</i>                            |
| <i>Camponotus longiceps</i>                              |
| <i>Camponotus minus</i>                                  |
| <i>Camponotus mitis</i>                                  |
| <i>Camponotus monju</i>                                  |
| <i>Camponotus nicobarensis</i>                           |
| <i>Camponotus nipponicus</i>                             |
| <i>Camponotus obscuripes</i>                             |
| <i>Camponotus parius</i>                                 |
| <i>Camponotus piceus</i>                                 |
| <i>Camponotus politae</i>                                |
| <i>Camponotus pseudoirritans</i>                         |
| <i>Camponotus pseudolendus</i>                           |
| <i>Camponotus punctatissimus</i>                         |
| <i>Camponotus quadrinotatus</i>                          |
| <i>Camponotus ragus</i>                                  |
| <i>Camponotus ranispinus</i>                             |
| <i>Camponotus variegatus</i>                             |
| <i>Camponotus variegatus subsp.</i><br><i>proles</i>     |
| <i>Camponotus reichardti</i>                             |
| <i>Camponotus ritreus</i>                                |

|                                               |                                |                                                    |
|-----------------------------------------------|--------------------------------|----------------------------------------------------|
|                                               |                                | <i>Camponotus rothneyi</i> subsp. <i>tairanae</i>  |
|                                               |                                | <i>Camponotus rubidus</i>                          |
|                                               |                                | <i>Camponotus rufoglaucus</i>                      |
|                                               |                                | <i>Camponotus sachalinensis</i>                    |
|                                               |                                | <i>Camponotus saxatilis</i>                        |
|                                               |                                | <i>Camponotus selene</i>                           |
|                                               |                                | <i>Camponotus semirafus</i>                        |
|                                               |                                | <i>Camponotus siemsseni</i>                        |
|                                               |                                | <i>Camponotus singularis</i>                       |
|                                               |                                | <i>Camponotus spanis</i>                           |
|                                               |                                | <i>Camponotus toi</i> subsp. <i>facansienensis</i> |
|                                               |                                | <i>Camponotus tokioensis</i>                       |
|                                               |                                | <i>Camponotus tonkinus</i>                         |
|                                               |                                | <i>Camponotus truebi</i>                           |
|                                               |                                | <i>Camponotus turkestanicus</i>                    |
|                                               |                                | <i>Camponotus turkestanus</i>                      |
|                                               |                                | <i>Camponotus variegatus</i>                       |
|                                               |                                | <i>Camponotus wasmanni</i>                         |
|                                               |                                | <i>Camponotus xingdoushanensis</i>                 |
|                                               |                                | <i>Camponotus yiningensis</i>                      |
|                                               | <i>Cataglyphis</i> (7 species) | <i>Cataglyphis aenescens</i>                       |
|                                               |                                | <i>Cataglyphis emeryi</i>                          |
|                                               |                                | <i>Cataglyphis flaviribia</i>                      |
|                                               |                                | <i>Cataglyphis glabilabia</i>                      |
|                                               |                                | <i>Cataglyphis helanensis</i>                      |
|                                               |                                | <i>Cataglyphis italicus</i>                        |
|                                               |                                | <i>Cataglyphis pallidus</i>                        |
|                                               | <i>Formica</i> (45 species)    | <i>Formica altayensis</i>                          |
|                                               |                                | <i>Formica approrimans</i>                         |
| <i>Formica aquilonia</i>                      |                                |                                                    |
| <i>Formica aseta</i>                          |                                |                                                    |
| <i>Formica beiineensis</i>                    |                                |                                                    |
| <i>Formica breviscapa</i>                     |                                |                                                    |
| <i>Formica candida</i>                        |                                |                                                    |
| <i>Formica candida</i> subsp. <i>formosae</i> |                                |                                                    |
| <i>Formica changhei</i>                       |                                |                                                    |
| <i>Formica cinerea</i>                        |                                |                                                    |
| <i>Formica cinereo</i>                        |                                |                                                    |
| <i>Formica clara</i>                          |                                |                                                    |
| <i>Formica cunicularia</i>                    |                                |                                                    |
| <i>Formica dachaidanensis</i>                 |                                |                                                    |

|  |                               |                               |
|--|-------------------------------|-------------------------------|
|  |                               | <i>Formica delinghaensis</i>  |
|  |                               | <i>Formica eongi</i>          |
|  |                               | <i>Formica ersecta</i>        |
|  |                               | <i>Formica fukaii</i>         |
|  |                               | <i>Formica fusca</i>          |
|  |                               | <i>Formica gagates</i>        |
|  |                               | <i>Formica gagatoides</i>     |
|  |                               | <i>Formica glabridorsis</i>   |
|  |                               | <i>Formica iabonica</i>       |
|  |                               | <i>Formica lemani</i>         |
|  |                               | <i>Formica liogaster</i>      |
|  |                               | <i>Formica liophthalma</i>    |
|  |                               | <i>Formica lugubris</i>       |
|  |                               | <i>Formica mesasiatica</i>    |
|  |                               | <i>Formica miniocca</i> Chang |
|  |                               | <i>Formica obsidiana</i>      |
|  |                               | <i>Formica pamirica</i>       |
|  |                               | <i>Formica polycheta</i>      |
|  |                               | <i>Formica pratensis</i>      |
|  |                               | <i>Formica rufa</i>           |
|  |                               | <i>Formica rufibarbis</i>     |
|  |                               | <i>Formica sanguinea</i>      |
|  |                               | <i>Formica sentschuensis</i>  |
|  |                               | <i>Formica sinae</i>          |
|  |                               | <i>Formica sinensis</i>       |
|  |                               | <i>Formica subpilosa</i>      |
|  |                               | <i>Formica subrufa</i>        |
|  |                               | <i>Formica truncorum</i>      |
|  |                               | <i>Formica uralensis</i>      |
|  |                               | <i>Formica villiscapa</i>     |
|  |                               | <i>Formica yessensis</i>      |
|  | <i>Gesomyrmex</i> (1 species) | <i>Gesomyrmer howardi</i>     |
|  | <i>Lasius</i> (19 species)    | <i>Lasius alienus</i>         |
|  |                               | <i>Lasius capitatus</i>       |
|  |                               | <i>Lasius carniolicus</i>     |
|  |                               | <i>Lasius coloratus</i>       |
|  |                               | <i>Lasius emarginatus</i>     |
|  |                               | <i>Lasius flavus</i>          |
|  |                               | <i>Lasius fuji</i>            |
|  |                               | <i>Lasius fuliginosus</i>     |
|  |                               | <i>Lasius hayashi</i>         |
|  |                               | <i>Lasius himalayanus</i>     |
|  |                               | <i>Lasius japonicus</i>       |
|  |                               |                               |

|  |                                     |                                  |
|--|-------------------------------------|----------------------------------|
|  |                                     | <i>Lasius longicirrus</i>        |
|  |                                     | <i>Lasius myops</i>              |
|  |                                     | <i>Lasius niger</i>              |
|  |                                     | <i>Lasius nipponensis</i>        |
|  |                                     | <i>Lasius obscuratus</i>         |
|  |                                     | <i>Lasius productus</i>          |
|  |                                     | <i>Lasius talpa</i>              |
|  |                                     | <i>Lasius umbratus</i>           |
|  | <i>Lepisiota</i> (8 species)        | <i>Lepisiota acuta</i>           |
|  |                                     | <i>Lepisiota capensis</i>        |
|  |                                     | <i>Lepisiota heriangu</i>        |
|  |                                     | <i>Lepisiota opaca</i>           |
|  |                                     | <i>Lepisiota pulchella</i>       |
|  |                                     | <i>Lepisiota reticulata</i>      |
|  |                                     | <i>Lepisiota rothneyi</i>        |
|  |                                     | <i>Lepisiota xichangensis</i>    |
|  | <i>Myrmoterias</i> (2 species)      | <i>Myrmoterias binghamii</i>     |
|  |                                     | <i>Myrmoterias cuneonodum</i>    |
|  | <i>Nylanderia</i> (21 species)      | <i>Nylanderia amia</i>           |
|  |                                     | <i>Nylanderia aseta</i>          |
|  |                                     | <i>Nylanderia birmana</i>        |
|  |                                     | <i>Nylanderia bourbonica</i>     |
|  |                                     | <i>Nylanderia flavipes</i>       |
|  |                                     | <i>Nylanderia formosae</i>       |
|  |                                     | <i>Nylanderia gulinensis</i>     |
|  |                                     | <i>Nylanderia indica</i>         |
|  |                                     | <i>Nylanderia integra</i>        |
|  |                                     | <i>Nylanderia kraepelini</i>     |
|  |                                     | <i>Nylanderia opisophthalmia</i> |
|  |                                     | <i>Nylanderia otome</i>          |
|  |                                     | <i>Nylanderia paraflavipas</i>   |
|  |                                     | <i>Nylanderia picta</i>          |
|  |                                     | <i>Nylanderia pieli</i>          |
|  |                                     | <i>Nylanderia ryukyuensis</i>    |
|  |                                     | <i>Nylanderia sharpii</i>        |
|  |                                     | <i>Nylanderia teranishii</i>     |
|  |                                     | <i>Nylanderia vividula</i>       |
|  |                                     | <i>Nylanderia yerburyi</i>       |
|  |                                     | <i>Nylanderia towori</i>         |
|  | <i>Oecophylla</i> (1 species)       | <i>Oecophylla smaragdina</i>     |
|  | <i>Paraparatrechina</i> (3 species) | <i>Paraparatrechina guanyin</i>  |
|  |                                     | <i>Paraparatrechina kongming</i> |
|  |                                     | <i>Paraparatrechina sauteri</i>  |

|  |                                 |                                  |
|--|---------------------------------|----------------------------------|
|  | <i>Paratrechina</i> (1 species) | <i>Paratrechina longicornis</i>  |
|  | <i>Plagiolepis</i> (9 species)  | <i>Plagiolepis alluaudi</i>      |
|  |                                 | <i>Plagiolepis cardiocarenis</i> |
|  |                                 | <i>Plagiolepis demangei</i>      |
|  |                                 | <i>Plagiolepis exigua</i>        |
|  |                                 | <i>Plagiolepis jerdonii</i>      |
|  |                                 | <i>Plagiolepis longwang</i>      |
|  |                                 | <i>Plagiolepis manczshurica</i>  |
|  |                                 | <i>Plagiolepis pallescens</i>    |
|  |                                 | <i>Plagiolepis pygmaea</i>       |
|  | <i>Polyergus</i> (2 species)    | <i>Polyergus rufescens</i>       |
|  |                                 | <i>Polyergus samurai</i>         |
|  | <i>Polyrhachis</i> (44 species) | <i>Polyrhachis armata</i>        |
|  |                                 | <i>Polyrhachis bakana</i>        |
|  |                                 | <i>Polyrhachis bicolor</i>       |
|  |                                 | <i>Polyrhachis bihamata</i>      |
|  |                                 | <i>Polyrhachis brericorpa</i>    |
|  |                                 | <i>Polyrhachis conzera</i>       |
|  |                                 | <i>Polyrhachis cornihumera</i>   |
|  |                                 | <i>Polyrhachis cyphonota</i>     |
|  |                                 | <i>Polyrhachis debilis</i>       |
|  |                                 | <i>Polyrhachis demangei</i>      |
|  |                                 | <i>Polyrhachis dentihumera</i>   |
|  |                                 | <i>Polyrhachis dives</i>         |
|  |                                 | <i>Polyrhachis euthiacaena</i>   |
|  |                                 | <i>Polyrhachis furcata</i>       |
|  |                                 | <i>Polyrhachis halidayi</i>      |
|  |                                 | <i>Polyrhachis hippomanes</i>    |
|  |                                 | <i>Polyrhachis illaudata</i>     |
|  |                                 | <i>Polyrhachis jianghuaensis</i> |
|  |                                 | <i>Polyrhachis laevigata</i>     |
|  |                                 | <i>Polyrhachis lamellidens</i>   |
|  |                                 | <i>Polyrhachis latona</i>        |
|  |                                 | <i>Polyrhachis lucidula</i>      |
|  |                                 | <i>Polyrhachis moesta</i>        |
|  |                                 | <i>Polyrhachis murina</i>        |
|  |                                 | <i>Polyrhachis nufipes</i>       |
|  |                                 | <i>Polyrhachis orbihumera</i>    |
|  |                                 | <i>Polyrhachis paracamponota</i> |
|  |                                 | <i>Polyrhachis proxima</i>       |
|  |                                 | <i>Polyrhachis pubescens</i>     |
|  |                                 | <i>Polyrhachis punctillata</i>   |
|  |                                 | <i>Polyrhachis rastellata</i>    |

|  |                                  |                                   |
|--|----------------------------------|-----------------------------------|
|  |                                  | <i>Polyrhachis rotoccipita</i>    |
|  |                                  | <i>Polyrhachis rubigastrica</i>   |
|  |                                  | <i>Polyrhachis schang</i>         |
|  |                                  | <i>Polyrhachis shixingensis</i>   |
|  |                                  | <i>Polyrhachis striata</i>        |
|  |                                  | <i>Polyrhachis subpilosa</i>      |
|  |                                  | <i>Polyrhachis thompsoni</i>      |
|  |                                  | <i>Polyrhachis thrinax</i>        |
|  |                                  | <i>Polyrhachis tibialis</i>       |
|  |                                  | <i>Polyrhachis tigilans</i>       |
|  |                                  | <i>Polyrhachis tschu</i>          |
|  |                                  | <i>Polyrhachis tyrannic</i>       |
|  |                                  | <i>Polyrhachis wolffi</i> Forel   |
|  | <i>Prenolepis</i> (11 species)   | <i>Prenolepis angularis</i>       |
|  |                                  | <i>Prenolepis emmae</i>           |
|  |                                  | <i>Prenolepis flariabdominis</i>  |
|  |                                  | <i>Prenolepis longiventris</i>    |
|  |                                  | <i>Prenolepis maznocula</i>       |
|  |                                  | <i>Prenolepis melanogaster</i>    |
|  |                                  | <i>Prenolepis naoroji</i>         |
|  |                                  | <i>Prenolepis nigriflagella</i>   |
|  |                                  | <i>Prenolepis seplemdenta</i>     |
|  |                                  | <i>Prenolepis sphingthoraxa</i>   |
|  |                                  | <i>Prenolepis umbra</i>           |
|  | <i>Proformica</i> (14 species)   | <i>Proformica buddhaensis</i>     |
|  |                                  | <i>Proformica coriacea</i>        |
|  |                                  | <i>Proformica dolichocephala</i>  |
|  |                                  | <i>Proformica epinotalis</i>      |
|  |                                  | <i>Proformica flarosetosa</i>     |
|  |                                  | <i>Proformica jacoti</i>          |
|  |                                  | <i>Proformica kascabi</i>         |
|  |                                  | <i>Proformica korbi</i>           |
|  |                                  | <i>Proformica mongolica</i>       |
|  |                                  | <i>Proformica nasuta</i>          |
|  |                                  | <i>Proformica nitida</i>          |
|  |                                  | <i>Proformica pilosiseapa</i>     |
|  |                                  | <i>Proformica splendida</i>       |
|  |                                  | <i>Proformicea striaticeps</i>    |
|  | <i>Pseudolasius</i> (12 species) | <i>Pseudolasius bidenticypeus</i> |
|  |                                  | <i>Pseudolasius binghami</i>      |
|  |                                  | <i>Pseudolasius cibdelus</i>      |
|  |                                  | <i>Pseudolasius emeryi</i>        |
|  |                                  | <i>Pseudolasius familiaris</i>    |



|                                                |                                   |                                                 |
|------------------------------------------------|-----------------------------------|-------------------------------------------------|
|                                                |                                   | <i>Pseudolasius hummeli</i>                     |
|                                                |                                   | <i>Pseudolasius longiscapus</i>                 |
|                                                |                                   | <i>Pseudolasius risii</i>                       |
|                                                |                                   | <i>Pseudolasius salvazai</i>                    |
|                                                |                                   | <i>Pseudolasius sauteri</i>                     |
|                                                |                                   | <i>Pseudolasius silvestrii</i>                  |
|                                                |                                   | <i>Pseudolasius similus</i>                     |
|                                                | <i>Rossomyrmex</i> (1species)     | <i>Rossomyrmex quandratinodum</i>               |
| Myrmicina<br>(Total 41 genera, 392<br>species) | <i>Acanthomyrmex</i> (3 species)  | <i>Acanthomyrmex crassispinus</i>               |
|                                                |                                   | <i>Acanthomyrmer glabfemorals</i>               |
|                                                |                                   | <i>Acanthomyrmex luciols</i>                    |
|                                                | <i>Anillomyrma</i> (1 species)    | <i>Anillomyrmez decamera subsp. continentis</i> |
|                                                | <i>Aphaenogaster</i> (25 species) | <i>Aphaenogaster angulata</i>                   |
|                                                |                                   | <i>Aphaenogaster beccari</i>                    |
|                                                |                                   | <i>Aphaenogaster caeciliae</i>                  |
|                                                |                                   | <i>Aphaenogaster concolor</i>                   |
|                                                |                                   | <i>Aphaenogaster ezasperata</i>                 |
|                                                |                                   | <i>Aphaenogaster famelica</i>                   |
|                                                |                                   | <i>Aphaenogaster feae</i>                       |
|                                                |                                   | <i>Aphaenogaster geei</i>                       |
|                                                |                                   | <i>Aphaenogaster hunanensis</i>                 |
|                                                |                                   | <i>Aphaenogaster incurviclepea</i>              |
|                                                |                                   | <i>Aphaenogaster japomica</i>                   |
|                                                |                                   | <i>Aphaenogaster lepida</i>                     |
|                                                |                                   | <i>Aphaenogaster longiceps</i>                  |
|                                                |                                   | <i>Aphaenogaster polyodonta</i>                 |
|                                                |                                   | <i>Aphaenogaster pumilopuncta</i>               |
|                                                |                                   | <i>Aphaenogaster rothneyi</i>                   |
|                                                |                                   | <i>Aphaenogaster schurri</i>                    |
|                                                |                                   | <i>Aphaenogaster smythiesii</i>                 |
|                                                |                                   | <i>Aphaenogaster suberaperata</i>               |
|                                                |                                   | <i>Aphaenogaster subterranea</i>                |
|                                                |                                   | <i>Aphaenogaster takahashii</i>                 |
|                                                |                                   | <i>Aphaenogaster tibetana</i>                   |
|                                                |                                   | <i>Aphaenogaster tipuna</i>                     |
|                                                |                                   | <i>Aphaenogaster tokarainsulana</i>             |
|                                                |                                   | <i>Aphaenogaster weigoldi</i>                   |
|                                                | <i>Atopomyrmex</i> (1 species)    | <i>Atopomyrmex srilankensis</i>                 |
|                                                | <i>Calyptomyrmex</i> (1 species)  | <i>Calyptomyrmer wittmeri</i>                   |
|                                                | <i>Cardiocondyla</i> (8 species)  | <i>Cardiocondyla elegans</i>                    |
|                                                |                                   | <i>Cardiocondyla insutura</i>                   |
|                                                |                                   | <i>Cardiocondyla nigra</i>                      |

|  |                            |                                                        |
|--|----------------------------|--------------------------------------------------------|
|  |                            | <i>Cardiocondyla nuda</i>                              |
|  |                            | <i>Cardiocondyla parvinoda</i>                         |
|  |                            | <i>Cardiocondyla stambuloffii</i>                      |
|  |                            | <i>Cardiocondyla wroughtoni</i> var. <i>obscurior</i>  |
|  |                            | <i>Cardiocondyla wroughtonii</i>                       |
|  | Carebara (1 species)       | <i>Carebara lignata</i>                                |
|  | Cataulacus (1 species)     | <i>Cataulacus granulatus</i>                           |
|  | Crematogaster (39 species) | <i>Crematogaster aitkenii</i>                          |
|  |                            | <i>Crematogaster anthracina</i>                        |
|  |                            | <i>Crematogaster artifex</i>                           |
|  |                            | <i>Crematogaster biroi</i>                             |
|  |                            | <i>Crematogaster bison</i>                             |
|  |                            | <i>Crematogaster brunnea</i> subsp. <i>ruginota</i>    |
|  |                            | <i>Crematogaster brunnea</i> var. <i>nicevillei</i>    |
|  |                            | <i>Crematogaster chungii</i>                           |
|  |                            | <i>Crematogaster contemta</i>                          |
|  |                            | <i>Crematogaster dohrni</i>                            |
|  |                            | <i>Crematogaster dohrni fabricans</i>                  |
|  |                            | <i>Crematogaster dohrni</i> subsp. <i>kiangsiensis</i> |
|  |                            | <i>Crematogaster ebenina</i>                           |
|  |                            | <i>Crematogaster egidyi</i>                            |
|  |                            | <i>Crematogaster ferrarii</i>                          |
|  |                            | <i>Crematogaster hogsomi</i>                           |
|  |                            | <i>Crematogaster jehovae</i>                           |
|  |                            | <i>Crematogaster macaoensis</i>                        |
|  |                            | <i>Crematogaster matsumurai</i>                        |
|  |                            | <i>Crematogaster millardi</i>                          |
|  |                            | <i>Crematogaster osakensis</i>                         |
|  |                            | <i>Crematogaster pia</i>                               |
|  |                            | <i>Crematogaster pia</i> var. <i>taivanae</i>          |
|  |                            | <i>Crematogaster politula</i>                          |
|  |                            | <i>Crematogaster popohana</i>                          |
|  |                            | <i>Crematogaster popohana</i> subsp. <i>amia</i>       |
|  |                            | <i>Crematogaster rogenhoferi</i>                       |
|  |                            | <i>Crematogaster ronganensis</i>                       |
|  |                            | <i>Crematogaster rothneyi</i>                          |
|  |                            | <i>Crematogaster sagei</i>                             |
|  |                            | <i>Crematogaster schimmeri</i>                         |

|                                   |                                                          |
|-----------------------------------|----------------------------------------------------------|
|                                   | <i>Crematogaster subdentata</i>                          |
|                                   | <i>Crematogaster subnuda</i>                             |
|                                   | <i>Crematogaster subnuda formosae</i>                    |
|                                   | <i>Crematogaster travancorensis</i>                      |
|                                   | <i>Crematogaster treubi</i>                              |
|                                   | <i>Crematogaster vagula</i>                              |
|                                   | <i>Crematogaster wroughtonii</i>                         |
|                                   | <i>Crematogaster zoceensis</i>                           |
|                                   |                                                          |
|                                   |                                                          |
| <i>Dacatria</i> (1 species)       | <i>Dacatria templaris</i>                                |
| <i>Dilobocondyla</i> (1 species)  | <i>Dilobocondyla fouqueti</i>                            |
| <i>Eurhopalothrix</i> (1 species) | <i>Eurhopalothrix procera</i>                            |
| <i>Gauromyrmex</i> (1 species)    | <i>Gauromyrmex acanthina</i>                             |
| <i>Kartidris</i> (5 species)      | <i>Kartidris ashima</i>                                  |
|                                   | <i>Kartidris fujianensis</i>                             |
|                                   | <i>Kartidris galos</i>                                   |
|                                   | <i>Kartidris nyos</i>                                    |
|                                   | <i>Kartidris sparsipila</i>                              |
| <i>Leptothorax</i> (14 species)   | <i>Leptothorax acervorum</i>                             |
|                                   | <i>Leptothorax argentipes</i>                            |
|                                   | <i>Leptothorax brevispinus</i>                           |
|                                   | <i>Leptothorax confucii</i>                              |
|                                   | <i>Leptothorax congruus</i> var. <i>wui</i>              |
|                                   | <i>Leptothorax eburneipes</i>                            |
|                                   | <i>Leptothorax fultonii</i>                              |
|                                   | <i>Leptothorax galeatus</i>                              |
|                                   | <i>Leptothorax muscorum</i>                              |
|                                   | <i>Leptothorax opaciabdomin</i>                          |
|                                   | <i>Leptothorax reduncus</i>                              |
|                                   | <i>Leptothorax reticulatus</i>                           |
|                                   | <i>Leptothorax spinosior</i>                             |
|                                   | <i>Leptothorax taivanensis</i>                           |
| <i>Lophomyrmex</i> (4 species)    | <i>Lophomyrmex bedoti</i>                                |
|                                   | <i>Lophomyrmex birmanus</i>                              |
|                                   | <i>Lophomyrmex quadrispinosus</i>                        |
|                                   | <i>Lophomyrmex quadrispinosus</i> subsp. <i>taivanae</i> |
| <i>Mayriella</i> (1 species)      | <i>Mayriella transfuga</i>                               |
| <i>Meranoplus</i> (4 species)     | <i>Meranoplus bicolor</i>                                |
|                                   | <i>Meranoplus bicolor</i> var. <i>fuscescens</i>         |
|                                   | <i>Meranoplus bicolor</i> subsp. <i>lucidus</i>          |

|                                |                                                       |
|--------------------------------|-------------------------------------------------------|
|                                | <i>Meranoplus laeiventris</i>                         |
| <i>Messor</i> (10 species)     | <i>Messor aciculatus</i>                              |
|                                | <i>Messor aciculatus var.risianus</i>                 |
|                                | <i>Messor aralocaspius</i>                            |
|                                | <i>Messor aralocaspius</i><br><i>subsp.infumatus</i>  |
|                                | <i>Messor denticulatus</i>                            |
|                                | <i>Messor ezursionis</i>                              |
|                                | <i>Messor inermis</i>                                 |
|                                | <i>Messor striatellus</i>                             |
|                                | <i>Messor structor</i>                                |
|                                | <i>Messor valentinae</i>                              |
| <i>Metapone</i> (1 species)    | <i>Metapone sauteri</i>                               |
| <i>Monomorium</i> (21 species) | <i>Monomorium bimaculatum</i>                         |
|                                | <i>Monomorium braunsi</i>                             |
|                                | <i>Monomorium chinense</i>                            |
|                                | <i>Monomorium concolor</i>                            |
|                                | <i>Monomorium destructor</i>                          |
|                                | <i>Monomorium floricola</i>                           |
|                                | <i>Monomorium hainanense</i>                          |
|                                | <i>Monomorium hiten</i>                               |
|                                | <i>Monomorium imperum</i>                             |
|                                | <i>Monomorium intrudens</i>                           |
|                                | <i>Monomorium intrudens subsp.</i><br><i>pieli</i>    |
|                                | <i>Monomorium latinode</i>                            |
|                                | <i>Monomorium latinodoides</i>                        |
|                                | <i>Monomorium mayri</i>                               |
|                                | <i>Monomorium monomorium</i>                          |
|                                | <i>Monomorium orientale</i>                           |
|                                | <i>Monomorium pharaonis</i>                           |
|                                | <i>Monomorium punctipectoris</i>                      |
|                                | <i>Monomorium sechellense</i>                         |
|                                | <i>Monomorium subopacum</i>                           |
|                                | <i>Monomorium triviale</i>                            |
| <i>Myrmecina</i> (7 species)   | <i>Myrmecina graminicola</i>                          |
|                                | <i>Myrmecina graminicola</i><br><i>subsp.sinensis</i> |
|                                | <i>Myrmecina guangziensis</i>                         |
|                                | <i>Myrmecina sauteri</i>                              |
|                                | <i>Myrmecina striata</i>                              |
|                                | <i>Myrmecina strigis</i>                              |
|                                | <i>Myrmecina taiwana</i>                              |

|                             |                                                        |
|-----------------------------|--------------------------------------------------------|
| <i>Myrmica</i> (39 species) | <i>Myrmica angulata</i>                                |
|                             | <i>Myrmica angulinodis</i>                             |
|                             | <i>Myrmica arisana</i>                                 |
|                             | <i>Myrmica cachmiriensis</i>                           |
|                             | <i>Myrmica chinensis</i>                               |
|                             | <i>Myrmica draco</i>                                   |
|                             | <i>Myrmica formosae</i>                                |
|                             | <i>Myrmica gallienii</i>                               |
|                             | <i>Myrmica helleri</i>                                 |
|                             | <i>Myrmica inezae</i>                                  |
|                             | <i>Myrmica jessensis</i>                               |
|                             | <i>Myrmica koreana</i>                                 |
|                             | <i>Myrmica kozlovi</i>                                 |
|                             | <i>Myrmica kozlovi subsp.mekongi</i>                   |
|                             | <i>Myrmica kozlovi</i><br><i>subsp.subalpina</i>       |
|                             | <i>Myrmica kozlovi</i><br><i>subsp.subbrevispinosa</i> |
|                             | <i>Myrmica lobicornis</i>                              |
|                             | <i>Myrmica margaritae</i>                              |
|                             | <i>Myrmica mirabile</i>                                |
|                             | <i>Myrmica ritae</i>                                   |
|                             | <i>Myrmica rubra</i>                                   |
|                             | <i>Myrmica ruginodis</i>                               |
|                             | <i>Myrmica ruginodis</i><br><i>var.khamensis</i>       |
|                             | <i>Myrmica rugosa</i>                                  |
|                             | <i>Myrmica saposhnikovi</i>                            |
|                             | <i>Myrmica scabrinodis</i>                             |
|                             | <i>Myrmica schenki</i>                                 |
|                             | <i>Myrmica serica</i>                                  |
|                             | <i>Myrmica sinensis</i>                                |
|                             | <i>Myrmica sinica</i>                                  |
|                             | <i>Myrmica smythiesii</i>                              |
|                             | <i>Myrmica smythiesii</i><br><i>subsp.exigua</i>       |
|                             | <i>Myrmica stangeana</i>                               |
|                             | <i>Myrmica sulcinodis</i>                              |
|                             | <i>Myrmica taibaiensis</i>                             |
|                             | <i>Myrmica tibetana</i>                                |
|                             | <i>Myrmica urbanii</i>                                 |
|                             | <i>Myrmica vandeli</i>                                 |
|                             | <i>Myrmica wesmeali</i>                                |

|                                  |                                     |
|----------------------------------|-------------------------------------|
| <i>Myrmicaria</i> (1 species)    | <i>Myrmicaria brunnea</i>           |
| <i>Oligomyrmex</i> (18 species)  | <i>Oligomyrmex acutispinus</i>      |
|                                  | <i>Oligomyrmex amius</i>            |
|                                  | <i>Oligomyrmer altinodus</i>        |
|                                  | <i>Oligomyrmer reticapitus</i>      |
|                                  | <i>Oligomyrmer sauteri</i>          |
|                                  | <i>Oligomyrmer striatus</i>         |
|                                  | <i>Oligomyrmer taiponicus</i>       |
|                                  | <i>Oligomyrmex bihornatus</i>       |
|                                  | <i>Oligomyrmex capreolus</i>        |
|                                  | <i>Oligomyrmex curvispinus</i>      |
|                                  | <i>Oligomyrmex hunanensis</i>       |
|                                  | <i>Oligomyrmex jiangxiensis</i>     |
|                                  | <i>Oligomyrmex polyphemus</i>       |
|                                  | <i>Oligomyrmex rectidorsus</i>      |
|                                  | <i>Oligomyrmex wheeleri</i>         |
|                                  | <i>Oligomyrmex lusciosus</i>        |
|                                  | <i>Oligomyrmex obtusidentus</i>     |
|                                  | <i>Oligomyrmex pseudolusciosus</i>  |
| <i>Perissomyrmex</i> (3 species) | <i>Perissomyrmex bidentatus</i>     |
|                                  | <i>Perissomyrmex fissus</i>         |
|                                  | <i>Perissomyrmex guizhouensis</i>   |
| <i>Pheidole</i> (48 species)     | <i>Pheidole allani</i>              |
|                                  | <i>Pheidole amia</i>                |
|                                  | <i>Pheidole aphраста</i>            |
|                                  | <i>Pheidole binghamii</i>           |
|                                  | <i>Pheidole capellinii</i>          |
|                                  | <i>Pheidole constanciae</i>         |
|                                  | <i>Pheidole ernsti</i>              |
|                                  | <i>Pheidole feae</i>                |
|                                  | <i>Pheidole fervens</i>             |
|                                  | <i>Pheidole fervens soror</i>       |
|                                  | <i>Pheidole fervens var.dolenda</i> |
|                                  | <i>Pheidole fervida</i>             |
|                                  | <i>Pheidole flaveria</i>            |
|                                  | <i>Pheidole funkikoensis</i>        |
|                                  | <i>Pheidole hongkongensis</i>       |
|                                  | <i>Pheidole indica</i>              |
|                                  | <i>Pheidole indosinensis</i>        |
|                                  | <i>Pheidole jucunda</i>             |
|                                  | <i>Pheidole longiscapus</i>         |
|                                  | <i>Pheidole malinsii</i>            |
|                                  | <i>Pheidole megacephala</i>         |

|  |                                   |                                               |
|--|-----------------------------------|-----------------------------------------------|
|  |                                   | <i>Pheidole meihuashanensis</i>               |
|  |                                   | <i>Pheidole multidentis</i>                   |
|  |                                   | <i>Pheidole nietneri</i>                      |
|  |                                   | <i>Pheidole noda</i>                          |
|  |                                   | <i>Pheidole noda var. flebilis</i>            |
|  |                                   | <i>Pheidole noda var. formosensis</i>         |
|  |                                   | <i>Pheidole nodgii var. zoceana</i>           |
|  |                                   | <i>Pheidole nodifera</i>                      |
|  |                                   | <i>Pheidole ocellata</i>                      |
|  |                                   | <i>Pheidole pieli</i>                         |
|  |                                   | <i>Pheidole rinae subsp. incensa</i>          |
|  |                                   | <i>Pheidole rinae tipuna</i>                  |
|  |                                   | <i>Pheidole roberti</i>                       |
|  |                                   | <i>Pheidole sagei</i>                         |
|  |                                   | <i>Pheidole sauteri</i>                       |
|  |                                   | <i>Pheidole selathoraz</i>                    |
|  |                                   | <i>Pheidole sinica</i>                        |
|  |                                   | <i>Pheidole smythiesii</i>                    |
|  |                                   | <i>Pheidole spathifera</i>                    |
|  |                                   | <i>Pheidole sulcaticeps</i>                   |
|  |                                   | <i>Pheidole taipoana</i>                      |
|  |                                   | <i>Pheidole taivanensis</i>                   |
|  |                                   | <i>Pheidole teneriffana</i>                   |
|  |                                   | <i>Pheidole tsailuni</i>                      |
|  |                                   | <i>Pheidole watsoni</i>                       |
|  |                                   | <i>Pheidole yeensis</i>                       |
|  |                                   | <i>Pheidole zhoushanensis</i>                 |
|  | <i>Pheidologeton</i> (12 species) | <i>Pheidologeton affinis</i>                  |
|  |                                   | <i>Pheidologeton dentivirus</i>               |
|  |                                   | <i>Pheidologeton diversus</i>                 |
|  |                                   | <i>Pheidologeton diversus subsp. laotinus</i> |
|  |                                   | <i>Pheidologeton draco</i>                    |
|  |                                   | <i>Pheidologeton fictus</i>                   |
|  |                                   | <i>Pheidologeton latinodus</i>                |
|  |                                   | <i>Pheidologeton melasolenus</i>              |
|  |                                   | <i>Pheidologeton nanningensis</i>             |
|  |                                   | <i>Pheidologeton trechiderus</i>              |
|  |                                   | <i>Pheidologeton vespillo</i>                 |
|  |                                   | <i>Pheidologeton yanoi</i>                    |
|  | <i>Pristomyrmex</i> (4 species)   | <i>Pristomyrmex brevispinosus</i>             |
|  |                                   | <i>Pristomyrmer formosae</i>                  |
|  |                                   | <i>Pristomyrmer hamatus</i>                   |

|                                     |                                      |
|-------------------------------------|--------------------------------------|
|                                     | <i>Pristomyrmex pungens</i>          |
| <i>Pyramica</i> (26 species)        | <i>Pyramica ailaoshana</i>           |
|                                     | <i>Pyramica benten</i>               |
|                                     | <i>Pyramica canina</i>               |
|                                     | <i>Pyramica dayui</i>                |
|                                     | <i>Pyramica dohertyi</i>             |
|                                     | <i>Pyramica elegantula</i>           |
|                                     | <i>Pyramica emeswangi</i>            |
|                                     | <i>Pyramica formosa</i>              |
|                                     | <i>Pyramica formosimonticola</i>     |
|                                     | <i>Pyramica heramera</i>             |
|                                     | <i>Pyramica hirashimai</i>           |
|                                     | <i>Pyramica japonica</i>             |
|                                     | <i>Pyramica kichijo</i>              |
|                                     | <i>Pyramica lachesis</i>             |
|                                     | <i>Pyramica leptothrix</i>           |
|                                     | <i>Pyramica mazu</i>                 |
|                                     | <i>Pyramica membranifera</i>         |
|                                     | <i>Pyramica mitis</i>                |
|                                     | <i>Pyramica mutica</i>               |
|                                     | <i>Pyramica nongba</i>               |
|                                     | <i>Pyramica sauteri</i>              |
|                                     | <i>Pyramica sinensis</i>             |
|                                     | <i>Pyramica takasago</i>             |
|                                     | <i>Pyramica tisiphone</i>            |
|                                     | <i>Pyramica wilsoni</i>              |
|                                     | <i>Pyramica yangi</i>                |
| <i>Recurvidris</i> (3 species)      | <i>Recurvidris glabriceps</i>        |
|                                     | <i>Recurvidris nuwa</i>              |
|                                     | <i>Recurvidris recurvispinosa</i>    |
| <i>Rhopalomastix</i> (1 species)    | <i>Rhopalomastix Forel</i>           |
| <i>Rhoptromyrmex</i> (1 species)    | <i>Rhoptromyrmer wroughtonii</i>     |
| <i>Rotastruma</i> (1 species)       | <i>Rotastruma stenoceps</i>          |
| <i>Solenopsis</i> (8 species)       | <i>Solenopsis geminata</i>           |
|                                     | <i>Solenopsis indagatrix</i>         |
|                                     | <i>Solenopsis jacoti</i>             |
|                                     | <i>Solenopsis jacoti pekingensis</i> |
|                                     | <i>Solenopsis saevissima</i>         |
|                                     | <i>Solenopsis soochowensis</i>       |
|                                     | <i>Solenopsis tipuna</i>             |
|                                     | <i>Solenopsis wagneri</i>            |
| <i>Stenamma</i> (1 species)         | <i>Stenamma orustoni</i>             |
| <i>Strongylognathus</i> (5 species) | <i>Strongylognathus chelifera</i>    |



|                                 |  |                                                      |
|---------------------------------|--|------------------------------------------------------|
|                                 |  | <i>Strongylognathus karawajewi</i>                   |
|                                 |  | <i>Strongylognathus koreanus</i>                     |
|                                 |  | <i>Strongylognathus potanini</i>                     |
|                                 |  | <i>Strongylognathus tylonum</i>                      |
| <i>Strumigenys</i> (19 species) |  | <i>Strumigenys chuchihensis</i>                      |
|                                 |  | <i>Strumigenys emmae</i>                             |
|                                 |  | <i>Strumigenys exilirhina</i>                        |
|                                 |  | <i>Strumigenys formosensis</i>                       |
|                                 |  | <i>Strumigenys hispida</i>                           |
|                                 |  | <i>Strumigenys jiangxiensis</i>                      |
|                                 |  | <i>Strumigenys konteiensis</i>                       |
|                                 |  | <i>Strumigenys lacunose</i>                          |
|                                 |  | <i>Strumigenys lewisi</i>                            |
|                                 |  | <i>Strumigenys lichiaensis</i>                       |
|                                 |  | <i>Strumigenys liukueiensis</i>                      |
|                                 |  | <i>Strumigenys minutula</i>                          |
|                                 |  | <i>Strumigenys nanzanensis</i>                       |
|                                 |  | <i>Strumigenys orchidensis</i>                       |
|                                 |  | <i>Strumigenys pilosa</i>                            |
|                                 |  | <i>Strumigenys rallarhina</i>                        |
|                                 |  | <i>Strumigenys solifontis</i>                        |
|                                 |  | <i>Strumigenys strygar</i>                           |
|                                 |  | <i>Strumigenys trada</i>                             |
| <i>Tetramorium</i> (46 species) |  | <i>Tetramorium amium</i>                             |
|                                 |  | <i>Tetramorium aptum</i>                             |
|                                 |  | <i>Tetramorium bicarinatum</i>                       |
|                                 |  | <i>Tetramorium caespitum</i>                         |
|                                 |  | <i>Tetramorium caespitum</i> var.<br><i>pallidum</i> |
|                                 |  | <i>Tetramorium ciliatum</i>                          |
|                                 |  | <i>Tetramorium crepum</i>                            |
|                                 |  | <i>Tetramorium cuneinode</i>                         |
|                                 |  | <i>Tetramorium cyclolobium</i>                       |
|                                 |  | <i>Tetramorium dunhuangense</i>                      |
|                                 |  | <i>Tetramorium feror</i>                             |
|                                 |  | <i>Tetramorium flavum</i>                            |
|                                 |  | <i>Tetramorium forte</i>                             |
|                                 |  | <i>Tetramorium guangriense</i>                       |
|                                 |  | <i>Tetramorium indicum</i>                           |
|                                 |  | <i>Tetramorium indosinense</i>                       |
|                                 |  | <i>Tetramorium inerme</i>                            |
|                                 |  | <i>Tetramorium inglebyi</i>                          |
|                                 |  | <i>Tetramorium insolens</i>                          |

|                                             |                                 |                                  |
|---------------------------------------------|---------------------------------|----------------------------------|
|                                             |                                 | <i>Tetramorium kheperrum</i>     |
|                                             |                                 | <i>Tetramorium khnum</i>         |
|                                             |                                 | <i>Tetramorium kraepelini</i>    |
|                                             |                                 | <i>Tetramorium lanuginosum</i>   |
|                                             |                                 | <i>Tetramorium laparum</i>       |
|                                             |                                 | <i>Tetramorium mai</i>           |
|                                             |                                 | <i>Tetramorium nipponense</i>    |
|                                             |                                 | <i>Tetramorium nursei</i>        |
|                                             |                                 | <i>Tetramorium obtusidens</i>    |
|                                             |                                 | <i>Tetramorium ochrothorax</i>   |
|                                             |                                 | <i>Tetramorium pacificum</i>     |
|                                             |                                 | <i>Tetramorium parvispinum</i>   |
|                                             |                                 | <i>Tetramorium pilosum</i>       |
|                                             |                                 | <i>Tetramorium repletum</i>      |
|                                             |                                 | <i>Tetramorium rizangense</i>    |
|                                             |                                 | <i>Tetramorium schneideri</i>    |
|                                             |                                 | <i>Tetramorium shensiense</i>    |
|                                             |                                 | <i>Tetramorium simillimum</i>    |
|                                             |                                 | <i>Tetramorium smithi</i>        |
|                                             |                                 | <i>Tetramorium striabdomen</i>   |
|                                             |                                 | <i>Tetramorium tonganum</i>      |
|                                             |                                 | <i>Tetramorium tsushimae</i>     |
|                                             |                                 | <i>Tetramorium turcomanicum</i>  |
|                                             |                                 | <i>Tetramorium undatum</i>       |
|                                             |                                 | <i>Tetramorium walshi</i>        |
|                                             |                                 | <i>Tetramorium yerburyi</i>      |
|                                             |                                 | <i>Tetramorium yulongense</i>    |
|                                             | <i>Vollenhovia</i> (4 species)  | <i>Vollenhovia emeryi</i>        |
|                                             |                                 | <i>Vollenhovia lucimandibula</i> |
|                                             |                                 | <i>Vollenhovia pyrrhoria</i>     |
|                                             |                                 | <i>Vollenhovia satoi</i>         |
|                                             | <i>Vombisidris</i> (1 species)  | <i>Vombisidris umbrabdomina</i>  |
| Ponerinae<br>(Total 14 genera, 117 species) | <i>Anochetus</i> (5 species)    | <i>Anochetus graeffei</i>        |
|                                             |                                 | <i>Anochetus risii</i>           |
|                                             |                                 | <i>Anochetus subcoecus</i>       |
|                                             |                                 | <i>Anochetus taiwaniensis</i>    |
|                                             |                                 | <i>Anochetus yunnanensis</i>     |
|                                             | <i>Centromyrmex</i> (1 species) | <i>Centromyrmex feae</i>         |
|                                             | <i>Cryptopone</i> (8 species)   | <i>Cryptopone butteli</i>        |
|                                             |                                 | <i>Cryptopone gigas</i>          |
|                                             |                                 | <i>Cryptopone jinxiuensis</i>    |
|                                             |                                 | <i>Cryptopone pseudogigas</i>    |
|                                             |                                 | <i>Cryptopone recticlypea</i>    |

|  |                                 |                                 |
|--|---------------------------------|---------------------------------|
|  |                                 | <i>Cryptopone sauteri</i>       |
|  |                                 | <i>Cryptopone sinensis</i>      |
|  |                                 | <i>Cryptopone taivanae</i>      |
|  | <i>Diacamma</i> (3 species)     | <i>Diacamma pallidum</i>        |
|  |                                 | <i>Diacamma rugosum</i>         |
|  |                                 | <i>Diacamma viridipurpureum</i> |
|  | <i>Emeryopone</i> (1 species)   | <i>Emeryopone melaina</i>       |
|  | <i>Harpegnathos</i> (2 species) | <i>Harpegnathos saltator</i>    |
|  |                                 | <i>Harpegnathos venator</i>     |
|  | <i>Hypoponera</i> (13 species)  | <i>Hypoponera bebpin</i>        |
|  |                                 | <i>Hypoponera biroi</i>         |
|  |                                 | <i>Hypoponera confinis</i>      |
|  |                                 | <i>Hypoponera cwaluwenburgi</i> |
|  |                                 | <i>Hypoponera excoecata</i>     |
|  |                                 | <i>Hypoponera gleadowi</i>      |
|  |                                 | <i>Hypoponera nippona</i>       |
|  |                                 | <i>Hypoponera opaciceps</i>     |
|  |                                 | <i>Hypoponera sauteri</i>       |
|  |                                 | <i>Hypoponera schauinslandi</i> |
|  |                                 | <i>Hypoponera silvestrii</i>    |
|  |                                 | <i>Hypoponerabondroit</i>       |
|  |                                 | <i>Hypoponeratruncata</i>       |
|  | <i>Leptogenys</i> (23 species)  | <i>Leptogenys binghamii</i>     |
|  |                                 | <i>Leptogenys birmana</i>       |
|  |                                 | <i>Leptogenys chinensis</i>     |
|  |                                 | <i>Leptogenys confucii</i>      |
|  |                                 | <i>Leptogenys crassicornis</i>  |
|  |                                 | <i>Leptogenys diminuta</i>      |
|  |                                 | <i>Leptogenys ergatogyna</i>    |
|  |                                 | <i>Leptogenys hezhouensis</i>   |
|  |                                 | <i>Leptogenys huapingensis</i>  |
|  |                                 | <i>Leptogenys kitteli</i>       |
|  |                                 | <i>Leptogenys kraepelini</i>    |
|  |                                 | <i>Leptogenys laeviterga</i>    |
|  |                                 | <i>Leptogenys laozii</i>        |
|  |                                 | <i>Leptogenys lucidula</i>      |
|  |                                 | <i>Leptogenys mengzii</i>       |
|  |                                 | <i>Leptogenys pangui</i>        |
|  |                                 | <i>Leptogenys peuqueti</i>      |
|  |                                 | <i>Leptogenys punctiventris</i> |
|  |                                 | <i>Leptogenys rufida</i>        |
|  |                                 | <i>Leptogenys strena</i>        |
|  |                                 | <i>Leptogenys sulcifrons</i>    |

|  |                                  |                                   |
|--|----------------------------------|-----------------------------------|
|  |                                  | <i>Leptogenys yerburyi</i>        |
|  |                                  | <i>Leptogenys zhuangzii</i>       |
|  | <i>Myopias</i> (2 species)       | <i>Myobias conicara</i>           |
|  |                                  | <i>Myopias nops</i>               |
|  | <i>Odontomachus</i> (8 species)  | <i>Odontomachus circulus</i>      |
|  |                                  | <i>Odontomachus fulgidus</i>      |
|  |                                  | <i>Odontomachus granatus</i>      |
|  |                                  | <i>Odontomachus haematodus</i>    |
|  |                                  | <i>Odontomachus monticola</i>     |
|  |                                  | <i>Odontomachus rirosus</i>       |
|  |                                  | <i>Odontomachus rizangensis</i>   |
|  |                                  | <i>Odontomachus tensus</i>        |
|  | <i>Odontoponera</i> (1 species)  | <i>Odontoponera transversa</i>    |
|  | <i>Pachycondyla</i> (24 species) | <i>Pachycondyla amblyops</i>      |
|  |                                  | <i>Pachycondyla annamita</i>      |
|  |                                  | <i>Pachycondyla astuta</i>        |
|  |                                  | <i>Pachycondyla bilosior</i>      |
|  |                                  | <i>Pachycondyla bispinosa</i>     |
|  |                                  | <i>Pachycondyla brevidorsa</i>    |
|  |                                  | <i>Pachycondyla cafferia</i>      |
|  |                                  | <i>Pachycondyla cavimaculata</i>  |
|  |                                  | <i>Pachycondyla chinensis</i>     |
|  |                                  | <i>Pachycondyla darwini</i>       |
|  |                                  | <i>Pachycondyla javana</i>        |
|  |                                  | <i>Pachycondyla leeuuenhoekii</i> |
|  |                                  | <i>Pachycondyla lobocarena</i>    |
|  |                                  | <i>Pachycondyla luteipes</i>      |
|  |                                  | <i>Pachycondyla melanaria</i>     |
|  |                                  | <i>Pachycondyla nigrita</i>       |
|  |                                  | <i>Pachycondyla rubiginosa</i>    |
|  |                                  | <i>Pachycondyla rufipes</i>       |
|  |                                  | <i>Pachycondyla sauteri</i>       |
|  |                                  | <i>Pachycondyla schaeferi</i>     |
|  |                                  | <i>Pachycondyla sharpi</i>        |
|  |                                  | <i>Pachycondyla stigma</i>        |
|  |                                  | <i>Pachycondyla tianzun</i>       |
|  |                                  | <i>Pachycondyla tonkina</i>       |
|  | <i>Platythyrea</i> (1 species)   | <i>Platythyrea clypeata</i>       |
|  | <i>Ponera</i> (25 species)       | <i>Ponera alisana</i>             |
|  |                                  | <i>Ponera baka</i>                |
|  |                                  | <i>Ponera bawana</i>              |
|  |                                  | <i>Ponera chiponensis</i>         |
|  |                                  | <i>Ponera diodonta</i>            |

|                                               |                                  |                                  |
|-----------------------------------------------|----------------------------------|----------------------------------|
|                                               |                                  | <i>Ponera grandis</i>            |
|                                               |                                  | <i>Ponera guangxiensis</i>       |
|                                               |                                  | <i>Ponera hubeiensis</i>         |
|                                               |                                  | <i>Ponera iabonica</i>           |
|                                               |                                  | <i>Ponera lonelina</i>           |
|                                               |                                  | <i>Ponera menglana</i>           |
|                                               |                                  | <i>Ponera nangongshana</i>       |
|                                               |                                  | <i>Ponera paedericera</i>        |
|                                               |                                  | <i>Ponera pentodontos</i>        |
|                                               |                                  | <i>Ponera pianmana</i>           |
|                                               |                                  | <i>Ponera rishen</i>             |
|                                               |                                  | <i>Ponera scabra</i>             |
|                                               |                                  | <i>Ponera shennong</i>           |
|                                               |                                  | <i>Ponera sinensis</i>           |
|                                               |                                  | <i>Ponera taiyangshen</i>        |
|                                               |                                  | <i>Ponera takaminei</i>          |
|                                               |                                  | <i>Ponera tamon</i>              |
|                                               |                                  | <i>Ponera tenuis</i>             |
|                                               |                                  | <i>Ponera xantha</i>             |
|                                               |                                  | <i>Ponera yuhuang</i>            |
| Proceratiinae<br>(Total 3 genera, 10 species) | <i>Discothyrea</i> (2 species)   | <i>Discothyrea sauteri</i>       |
|                                               |                                  | <i>Discothyrea yueshen</i>       |
|                                               | <i>Probolomyrmex</i> (2 species) | <i>Probolomyrmex longinodus</i>  |
|                                               |                                  | <i>Probolomyrmex longiscapus</i> |
|                                               | <i>Proceratium</i> (6 species)   | <i>Proceratium itoi</i>          |
|                                               |                                  | <i>Proceratium japonicum</i>     |
|                                               |                                  | <i>Proceratium longigaster</i>   |
|                                               |                                  | <i>Proceratium longmenense</i>   |
|                                               |                                  | <i>Proceratium nujiangense</i>   |
|                                               |                                  | <i>Proceratium zhaoi</i>         |
